# Supplementary material
Source: HighWire-hosted journal article supplement (https://tech.snmjournals.org/highwire/filestream/10210/field_highwire_adjunct_files/1/262719_Supplemental_Data.pdf)
Supplement: 262719_Supplemental_Data.pdf [file 262719_Supplemental_Data.pdf]

We provide a template Excel® spreadsheet (Probe Efficiency Calculator.xlsx) to laboratories that wish to implement thyroid probe efficiency quality control. The spreadsheet uses repeat measurements by laboratory technologists to determine the nominal efficiency in the laboratory, its variance and confidence intervals for quality control. Four levels of quality control are determined: low error, low warning, high warning, and high error. See the discussion section for usage instructions.
